# Supplementary material
Source: PubMed Central journal article supplement (PMC4219259)
Supplement: NIHMS638116-supplement-Supplementary_material.pdf [file NIHMS638116-supplement-Supplementary_material.pdf]

**Electronic Table 1. Hazard ratios for late recurrent AF, LVEF  $\geq$ 50%**

| Hazard Ratio (95% Confidence Interval) for AF Recurrence |                   |                       |
|----------------------------------------------------------|-------------------|-----------------------|
| <u>LAPEF Quintile</u>                                    | Unadjusted model  | Fully Adjusted model* |
| 5 (best function)                                        | 1.00 (Ref)        | 1.00 (Ref)            |
| 4                                                        | 2.90 (1.22-6.90)  | 2.52 (1.05-6.04)      |
| 3                                                        | 2.54 (1.05-6.18)  | 2.09 (0.85-5.16)      |
| 2                                                        | 4.86 (2.11-11.20) | 3.85 (1.65-9.00)      |
| 1 (worst function)                                       | 7.93 (3.54-17.76) | 6.20 (2.71-14.20)     |

Wald Chi-square (unadjusted model) = 36.7  
Wald Chi-square (fully adjusted model) = 54.8  
\*Fully adjusted model: includes age, sex, hypertension, BSA-adjusted left atrial volume, non-paroxysmal AF, diabetes, >1 prior ablation procedure

**Electronic Table 2. Hazard ratios for late recurrent AF, LVEF <50%**

| Hazard Ratio (95% Confidence Interval) for AF Recurrence |                  |                       |
|----------------------------------------------------------|------------------|-----------------------|
| <u>LAPEF Quintile</u>                                    | Unadjusted model | Fully Adjusted model* |
| 5 (best function)                                        | 1.00 (Ref)       | --                    |
| 4                                                        | 0.17 (0.02-1.42) | --                    |
| 3                                                        | 0.55 (0.16-1.89) | --                    |
| 2                                                        | 0.34 (0.08-1.45) | --                    |
| 1 (worst function)                                       | 0.98 (0.23-4.15) | --                    |

Wald Chi-square (unadjusted model) = 4.6  
\*Fully adjusted model was not performed given limited number of subjects (N=49) and outcome events (N=17)
